# Supplementary material for: Changes in Trimethylamine-N-oxide Levels in Obese Patients following Laparoscopic Roux-en-Y Gastric Bypass or Sleeve Gastrectomy in a Korean Obesity Surgical Treatment Study (KOBESS)
Source: MDPI journal article supplement (doi:10.3390/jcm10215091), 2021-10-29
Supplement: s1 [file s1]

**Table S1.** The changes in metabolites at baseline and 6 months in subjects with T2DM and non-T2DM.

|                | T2DM (n=18) |                  |                | Non-T2DM (n=20) |                  |                |                  |
|----------------|-------------|------------------|----------------|-----------------|------------------|----------------|------------------|
|                | Baseline    | Six months after | <i>P</i> value | Baseline        | Six months after | <i>P</i> value | <i>P</i> * value |
| Betaine (μM)   | 15.3 ± 6.3  | 17.3 ± 8.1       | 0.235          | 15.5 ± 6.0      | 17.0 ± 8.1       | 0.325          | 0.897            |
| Carnitine (μM) | 15.2 ± 5.6  | 16.1 ± 5.8       | 0.410          | 16.7 ± 5.9      | 15.7 ± 4.9       | 0.247          | 0.429            |
| Choline (μM)   | 4.3 ± 3.2   | 4.8 ± 6.6        | 0.732          | 5.3 ± 6.3       | 3.1 ± 3.7        | 0.192          | 0.574            |
| TMAO (μM)      | 2.2 ± 1.6   | 4.9 ± 5.9        | 0.072          | 2.8 ± 3.9       | 2.0 ± 1.7        | 0.470          | 0.581            |

\*Comparison of baseline values between two groups, Data presented as mean ± standard deviation.  
T2DM type 2 diabetes mellitus; BMI body mass index; TMAO trimethylamine-N-oxide

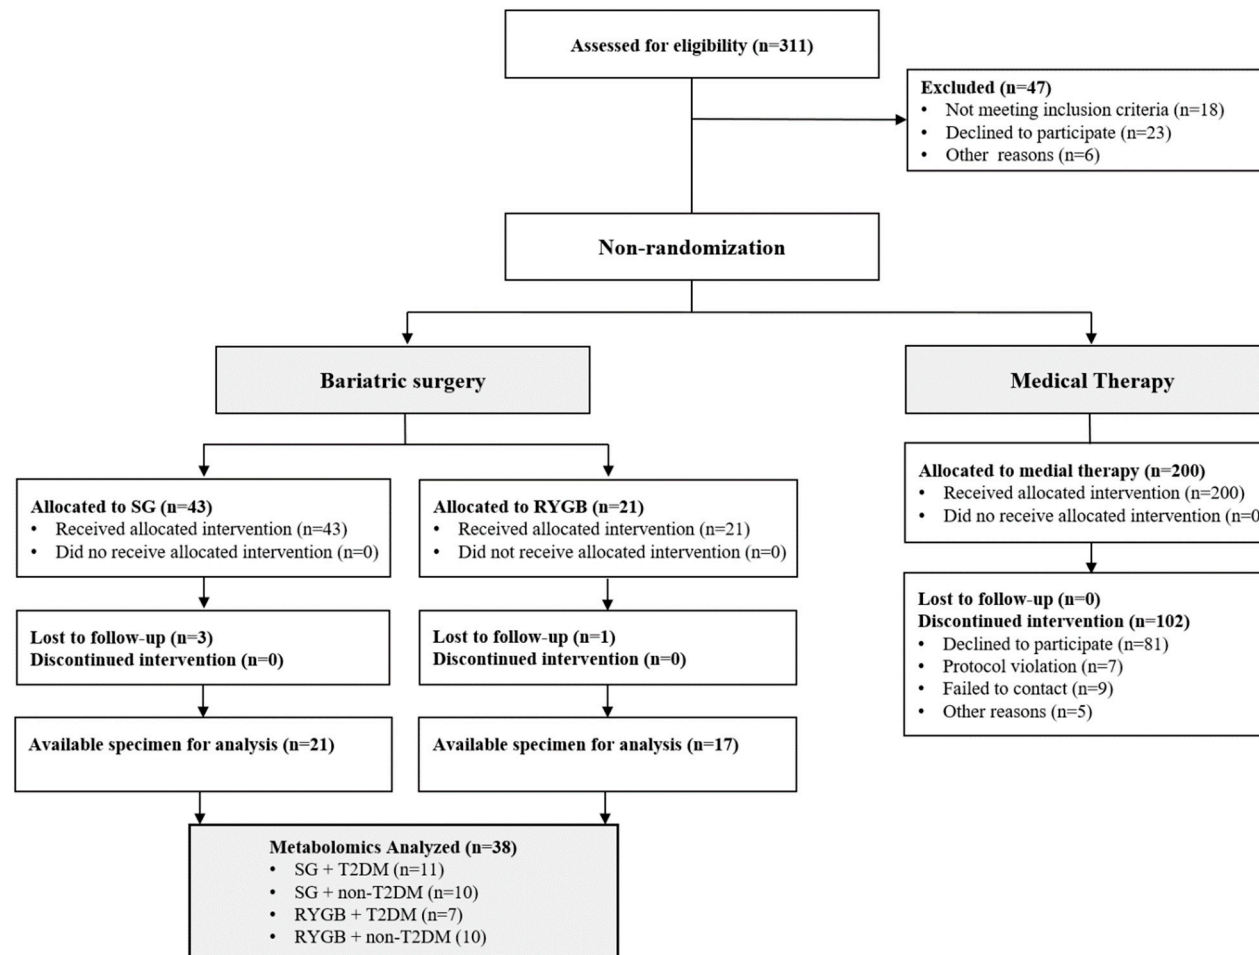

**Fig. S1** Flow chart of the KOBESS study
